# Supplementary material for: Mechanisms of epigallocatechin gallate (EGCG) in ameliorating hyperuricemia: insights into gut microbiota and intestinal function in a mouse model
Source: Royal Society of Chemistry journal article supplement (doi:10.1039/d4fo01606h), 2024-01-01
Supplement: d4fo01606h1.pdf [file d4fo01606h1.pdf]

**Fig. S1. The chromatogram of EGCG by HPLC analysis.**

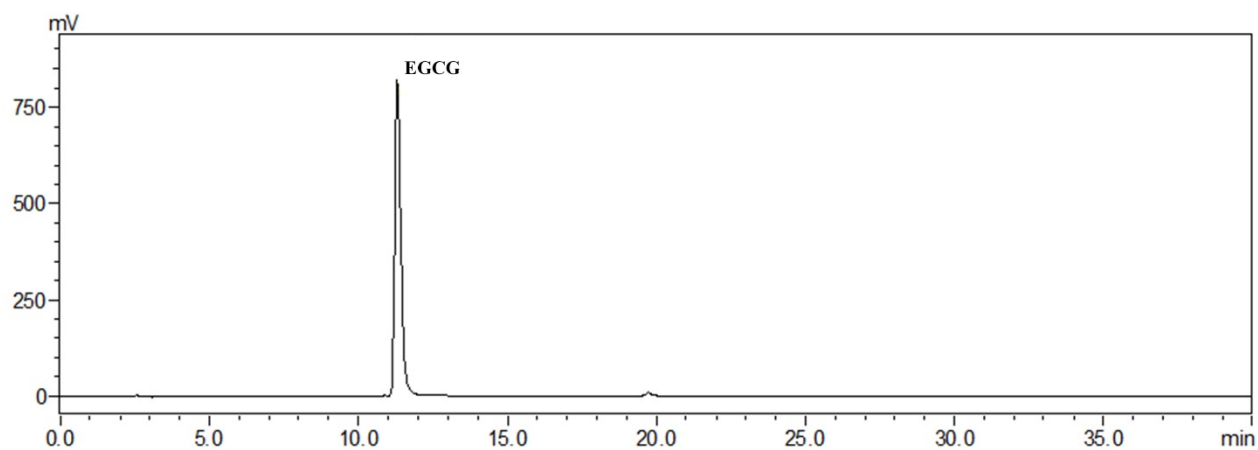

**Fig. S2. Alpha diversity of the gut microbiota on OTU level. (A) shannon index, (B) simpson index, (C) chao index and (D) ace index.**

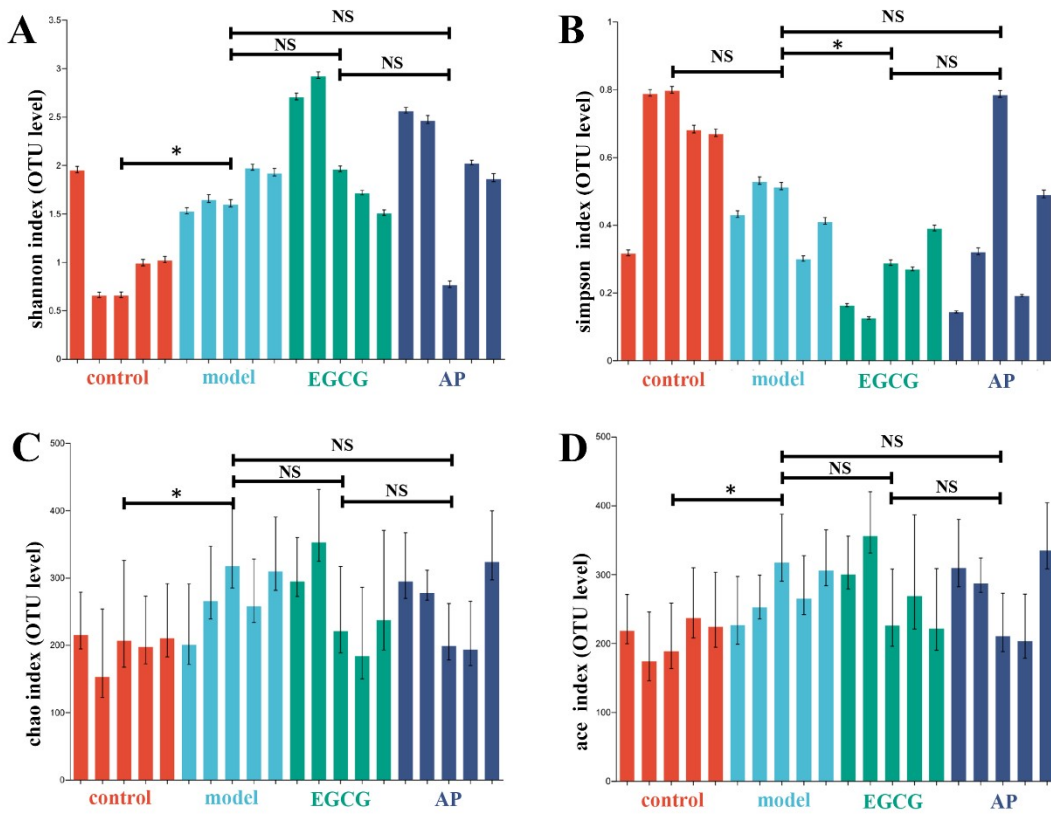

**Fig. S3. Spearson correlation analysis between the bacteria on order level and UA-related parameters** (UA level in serum and gene expression in kidney; \*:  $p < 0.05$ , \*\*:  $p < 0.01$  and \*\*\*:  $p < 0.001$ ).

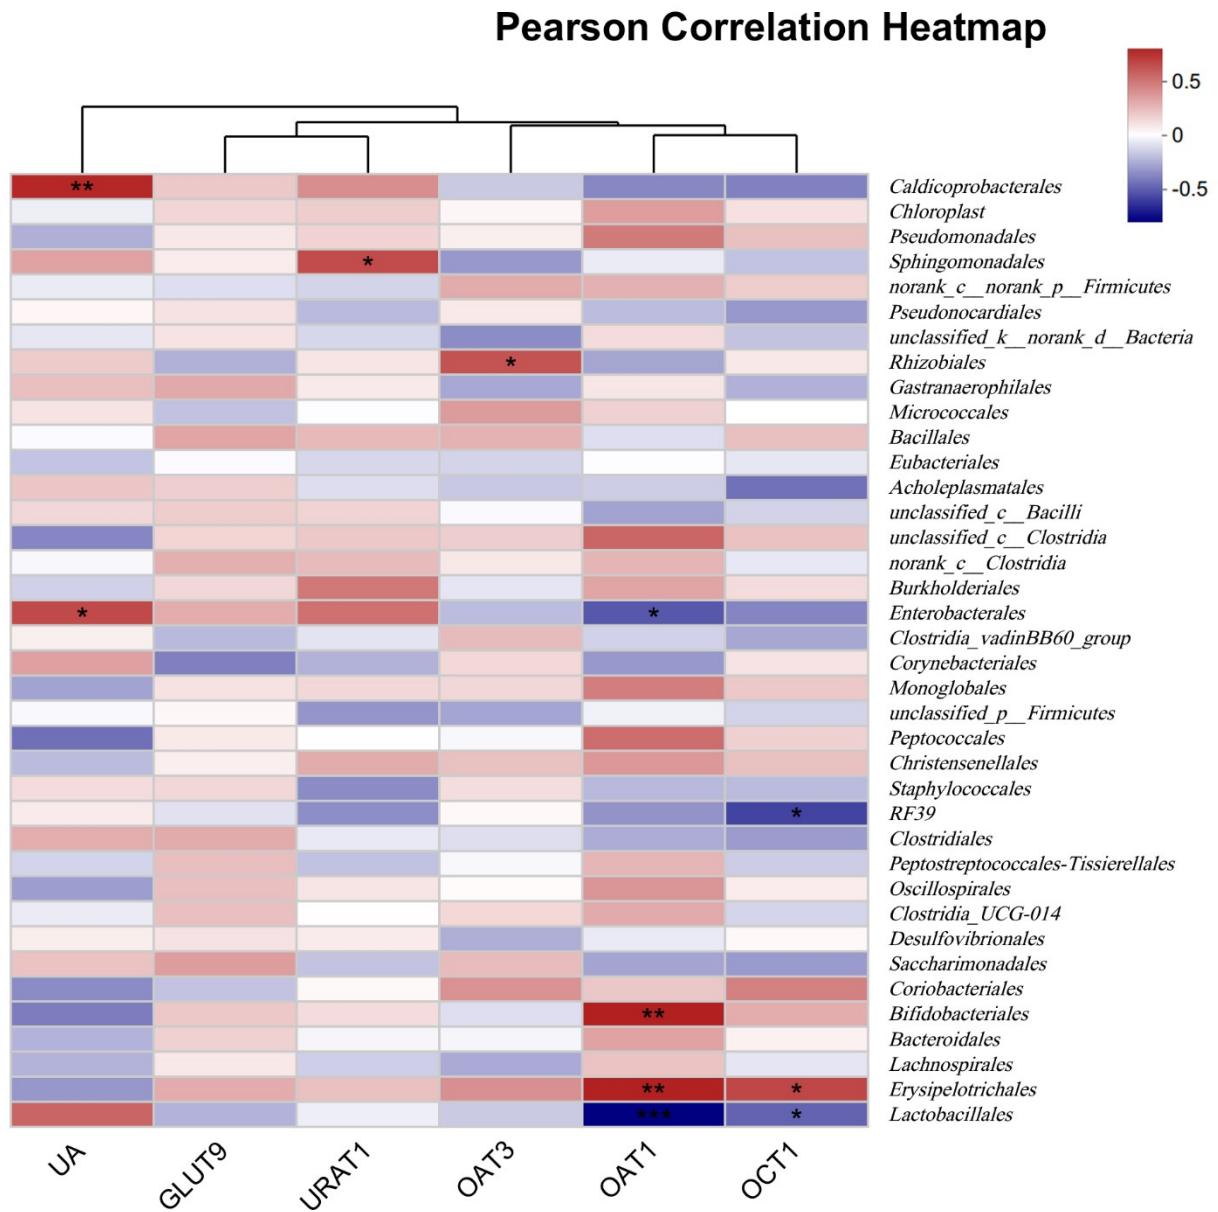

**Table S1 Primers of RT PCR**

| Genes          | Sequence of primers                                                            |
|----------------|--------------------------------------------------------------------------------|
| <i>Urat1</i>   | Forward: 5'-CTGTTAAGTGGCCTAGCTG-3'<br>Reverse: 5'-CTTCACTGACTGTTTCTGGA-3'      |
| <i>Glut9</i>   | Forward: 5'-GTGGACTCAATGCGATCTG-3'<br>Reverse: 5'-TGATGTATGGGATCTTGCCT-3'      |
| <i>Oat1</i>    | Forward: 5'-TGTGCCTTTTTTCGTTG-3'<br>Reverse: 5'-TAGCCCCCTCTTCTTGT-3'           |
| <i>Oat3</i>    | Forward: 5'-GATCTACAACAGCACCAGAGAC-3'<br>Reverse: 5'-TATACCTGCCATGAAGACTGAC-3' |
| <i>Oct1</i>    | Forward: 5'-GCCAGTCAACACCAAAGCG-3'<br>Reverse: 5'-CCATAGCGAGCCCAACATC-3'       |
| <i>β-actin</i> | Forward: 5'-CACTGTCGAGTCGCGTCC-3'<br>Reverse: 5'-TCATCCATGGCGAACTGGTG-3'       |

**Table S2 Description of the sequencing data and mapping information**

| Sample   | Raw reads | Raw bases  | Clean reads | Clean bases | Error rate | Q20    | Q30    | GC content | Total mapped     | Multiple mapped  | Unique mapped    |
|----------|-----------|------------|-------------|-------------|------------|--------|--------|------------|------------------|------------------|------------------|
| control1 | 59554992  | 8992803792 | 59078078    | 8741146454  | 0.0242%    | 98.39% | 94.92% | 46.74%     | 56799360(96.14%) | 9575104(16.21%)  | 47224256(79.94%) |
| control2 | 54777966  | 8271472866 | 54371376    | 8098063047  | 0.0249%    | 98.13% | 94.18% | 46.22%     | 52436384(96.44%) | 9137337(16.81%)  | 43299047(79.64%) |
| control3 | 45368796  | 6850688196 | 45045744    | 6770033514  | 0.0252%    | 98.09% | 93.85% | 43.75%     | 43725172(97.07%) | 11618492(25.79%) | 32106680(71.28%) |
| control4 | 44115160  | 6661389160 | 43730746    | 6533767622  | 0.0249%    | 98.15% | 94.14% | 45.23%     | 42164235(96.42%) | 9284394(21.23%)  | 32879841(75.19%) |
| control5 | 43297398  | 6537907098 | 42775714    | 6355114264  | 0.0251%    | 98.07% | 94.02% | 43.75%     | 41355487(96.68%) | 11347116(26.53%) | 30008371(70.15%) |
| model1   | 42043516  | 6348570916 | 41665882    | 6225269280  | 0.0250%    | 98.12% | 94.11% | 46.40%     | 40086925(96.21%) | 7456870(17.9%)   | 32630055(78.31%) |
| model2   | 43312546  | 6540194446 | 42899356    | 6433144695  | 0.0249%    | 98.12% | 94.14% | 46.78%     | 41407870(96.52%) | 6624801(15.44%)  | 34783069(81.08%) |
| model3   | 43523990  | 6572122490 | 43135586    | 6450833408  | 0.0247%    | 98.21% | 94.39% | 46.46%     | 41663748(96.59%) | 6606824(15.32%)  | 35056924(81.27%) |
| model4   | 44621630  | 6737866130 | 44271840    | 6612241367  | 0.0247%    | 98.23% | 94.42% | 47.68%     | 42443355(95.87%) | 6130185(13.85%)  | 36313170(82.02%) |
| model5   | 57746592  | 8719735392 | 57089560    | 8503966906  | 0.0245%    | 98.31% | 94.62% | 45.15%     | 55349737(96.95%) | 12584191(22.04%) | 42765546(74.91%) |
| EGCG1    | 49010972  | 7400656772 | 48531360    | 7195280082  | 0.0250%    | 98.10% | 94.13% | 45.87%     | 46908954(96.66%) | 9576782(19.73%)  | 37332172(76.92%) |
| EGCG2    | 61732952  | 9321675752 | 61124798    | 9087853052  | 0.0244%    | 98.34% | 94.77% | 47.21%     | 58856198(96.29%) | 9367821(15.33%)  | 49488377(80.96%) |
| EGCG3    | 51117794  | 7718786894 | 50726348    | 7573643391  | 0.0245%    | 98.27% | 94.56% | 46.22%     | 48986240(96.57%) | 8754411(17.26%)  | 40231829(79.31%) |
| EGCG4    | 46541390  | 7027749890 | 46267594    | 6897705613  | 0.0247%    | 98.20% | 94.36% | 48.69%     | 44080092(95.27%) | 5232043(11.31%)  | 38848049(83.96%) |
| EGCG5    | 46060890  | 6955194390 | 45768420    | 6874039576  | 0.0245%    | 98.30% | 94.58% | 46.88%     | 44334339(96.87%) | 6711396(14.66%)  | 37622943(82.2%)  |
